# Supplementary material for: Oral Administration of a Select Mixture of Lactobacillus and Bacillus Alleviates Inflammation and Maintains Mucosal Barrier Integrity in the Ileum of Pigs Challenged with Salmonella Infantis
Source: MDPI journal article supplement (doi:10.3390/microorganisms7050135), 2019-05-15
Supplement: s1 [file s1]

**Table S1.** Effects of oral administration of LBB-mix on the incidence of diarrhea in newly weaned pigs before and after *S. Infantis* challenge.

| Group <sup>1</sup> /item | Pigs <sup>2</sup> |               | Pig days |         |               |       |                            |     |
|--------------------------|-------------------|---------------|----------|---------|---------------|-------|----------------------------|-----|
|                          | At risk           | With diarrhea |          | At risk | With diarrhea |       | Significance of difference |     |
|                          | (n)               | (n)           | (%)      | (n)     | (n)           | (%)   | SI                         | PS  |
| Pre-challenge            |                   |               |          |         |               |       |                            |     |
| CN                       | 8                 | 0             | 0        | 54      | 6             | 11.11 | *                          |     |
| SI                       | 8                 | 0             | 0        | 53      | 6             | 11.32 |                            |     |
| PS                       | 8                 | 3             | 37.5     | 56      | 12            | 21.43 |                            |     |
| Post-challenge           |                   |               |          |         |               |       |                            |     |
| CN                       | 8                 | 0             | 0        | 38      | 5             | 13.16 | ***                        | *** |
| SI                       | 8                 | 8             | 100      | 37      | 34            | 91.89 |                            | *   |
| PS                       | 8                 | 8             | 100      | 40      | 35            | 87.5  |                            |     |

<sup>1</sup> CN, control group with sterile physiological saline; SI, oral sterile physiological saline from day 1 to day 7 followed by *S. Infantis* challenge; PS, pretreated with potential probiotic mixture for day 1 to day 7 and followed by *S. Infantis* challenge. <sup>2</sup> In this study, two consecutive fecal scores greater than 4 were identified as diarrhea in the pig. *n* = 8 pigs per group; Pearson's chi-square test. \**p* < 0.05; \*\* *p* < 0.01; \*\*\* *p* < 0.001.
